# Supplementary material
Source: PubMed Central journal article supplement (PMC10563447)
Supplement: EMBR-21-e49351-s001.pdf [file EMBR-21-e49351-s001.pdf]

# Anti-HIV-1 antibodies trigger non-lytic complement deposition on infected cells

Jérémy Dufloo<sup>1,2</sup>, Florence Guivel-Benhassine<sup>1</sup>, Julian Buchrieser<sup>1</sup>, Valérie Lorin<sup>3</sup>, Ludivine Grzelak<sup>1</sup>, Emilie Dupouy<sup>1</sup>, Guillaume Mestrallet<sup>1</sup>, Katia Bourdic<sup>5,6</sup>, Olivier Lambotte<sup>5,6</sup>, Hugo Mouquet<sup>3,4</sup>, Timothée Bruel<sup>1,4,\*</sup> and Olivier Schwartz<sup>1,4,\*</sup>

<sup>1</sup>Virus & Immunity Unit, Department of Virology, Institut Pasteur, Paris 75015, France; CNRS UMR 3569, Paris 75015, France.

<sup>2</sup>Paris Diderot University, Sorbonne Paris Cité, Paris 75013, France.

<sup>3</sup>Laboratory of Humoral Immunology, Department of Immunology, Institut Pasteur, Paris 75015, France; INSERM U1222, Paris 75015, France.

<sup>4</sup>Vaccine Research Institute, Créteil, France.

<sup>5</sup>CEA, DSV/IMETI, IDMIT; Université Paris Sud, UMR-1184; Inserm, U1184, Center for Immunology of Viral Infections and Autoimmune Diseases.

<sup>6</sup>APHP, Service de Médecine Interne-Immunologie Clinique, Hôpitaux Universitaires Paris Sud, le Kremlin Bicêtre, France.

\*These authors contributed equally

Correspondence to: tbruel@pasteur.fr and schwartz@pasteur.fr

## Table of Contents

|                         |   |
|-------------------------|---|
| Appendix Table S1 ..... | 2 |
| Appendix Table S2 ..... | 3 |
| Appendix Table S3 ..... | 4 |

**Appendix Table S1. Monoclonal antibodies used in this study**

| Antibody  | Epitope             | Reference                                  |
|-----------|---------------------|--------------------------------------------|
| N6        | CD4 binding site    | Huang 2016 Immunity                        |
| 3BNC117   | CD4 binding site    | Scheid 2011 Science                        |
| VRC01     | CD4 binding site    | Wu 2010 Science                            |
| CH103     | CD4 binding site    | Liao 2013 Nature                           |
| b12       | CD4 binding site    | Burton 1991 PNAS                           |
| 10-1074   | V3 Glycans          | Mouquet 2012 PNAS                          |
| PGT121    | V3 Glycans          | Walker 2011 Nature                         |
| PGT128    | V3 Glycans          | Walker 2011 Nature                         |
| PGDM1400  | V1/V2 Glycans       | Sok 2014 PNAS                              |
| PG16      | V1/V2 Glycans       | Walker 2009a Science                       |
| m66.6     | MPER                | Zhu 2011 J. Virol                          |
| 10E8      | MPER                | Huang 2012 Nature                          |
| 4E10      | MPER                | Buchacher 1994 AIDS Res. Hum. Retroviruses |
| 3BC176    | Gp120/41 interface  | Klein 2012 J Exp Med                       |
| PGT151    | Gp120/41 interface  | Falkowska 2014 Immunity                    |
| 8ANC195   | Gp120/41 interface  | Scheid 2011 Science                        |
| 5-25      | Gp41 immunodominant | Scheid 2009 Nature                         |
| A32       | cluster A           | Moore J Virol 1993                         |
| 10-188    | V3 crown            | Mouquet 2011 Plos One                      |
| 2-59      | V3 crown            | Scheid 2009 Nature                         |
| 4-42      | CoRBS               | Scheid 2009 Nature                         |
| 1-863     | CD4 binding site    | Scheid 2009 Nature                         |
| rituximab | CD20                | Maloney 1997 Blood                         |
| mGO53     | isotype control     | Wardemann 2003 Science                     |

**Appendix Table S2. CDC IC50 of selected antibodies**

| Antibody  | CDC IC50<br>( $\mu\text{g mL}^{-1}$ ) | Plateau (%) |
|-----------|---------------------------------------|-------------|
| N6        | 2.4                                   | 73          |
| 3BNC117   | 0.8                                   | 76          |
| CH103     | 9                                     | 86          |
| 10-1074   | 1                                     | 85          |
| PGT121    | 1.7                                   | 88          |
| PGT128    | 2.6                                   | 62          |
| 10E8      | 16                                    | 60          |
| 5-25      | 0.3                                   | 30          |
| rituximab | 0.6                                   | 99          |

**Appendix Table S3. Patients' characteristics**

| Patient ID | Sex    | Year of diagnosis | ART duration (years) | CD4 count (per mm <sup>3</sup> ) | CD8 count (per mm <sup>3</sup> ) | Viral load (RNA copies/mL) | Viral DNA (copies/10 <sup>6</sup> leucocytes) |
|------------|--------|-------------------|----------------------|----------------------------------|----------------------------------|----------------------------|-----------------------------------------------|
| KBS98      | Female | 2005              | 12                   | 586                              | 704                              | <40                        | und.                                          |
| KBS99      | Male   | 1993              | 12                   | 705                              | 406                              | <40                        | und.                                          |
| KBS100     | Male   | 1999              | 17                   | 562                              | 1193                             | <40                        | 135                                           |
| KBS101     | Male   | 2007              | 7                    | 1147                             | 895                              | <40                        | 154                                           |
| KBS102     | Female | 2000              | 12                   | 897                              | 501                              | <40                        | 457                                           |
| KBS103     | Male   | 2009              | 8                    | 605                              | 1891                             | <40                        | 256                                           |
| KBS104     | Female | 2003              | 11                   | 724                              | 1008                             | <40                        | 213                                           |
| KBS105     | Female | 2005              | 13                   | 813                              | 302                              | <40                        | 111                                           |
| KBS106     | Male   | 1992              | 10                   | 739                              | 1030                             | <40                        | 186                                           |
